# Supplementary material for: Histopathological analysis of zebrafish after introduction of non-biodegradable polyelectrolyte microcapsules into the circulatory system
Source: PeerJ. 2021 May 5;9:e11337. doi: 10.7717/peerj.11337 (PMC8106396; doi:10.7717/peerj.11337)
Supplement: Table S2 [file peerj-09-11337-s002.xlsx]

## Sheet: Лист1
Supplementary Table 2. Distribution of PMs-PEG in fish organs (average number of microcapsules per histological section)
Sample	Kidney (out of injection site)	Liver	Gill capillaries	The intestinal wall	Skeletal muscles	Heart	Brain	Spinal cord	Spinal canal	Pancreas	Eye
1 day
№1	>5	>5	2-5	0	1	>5	1	0	0	0	0
№2	>5	2-5	2-5	0	1	0	1	0	0	0	0
№3	>5	>5	>5	0	1	0	0	0	0	0	0
average	5	5	2	0	1	0	1	0	0	0	0
14 days
№4	>5	>5	1	>5	2-5	0	1	0	0	0	1
№5	>5	>5	0	>5	2-5	0	0	1	0	0	0
№6	>5	1	0	0	0	0	0	0	0	0	0
average	5	5	0	5	2	0	0	0	0	0	0
22 days
№7	>5	2-5	>5	>5	>5	>5	1	0	>5	>5	0
№8	>5	>5	1	>5	>5	0	0	0	0	1	0
№9	>5	>5	>5	>5	0	0	0	0	0	0	0
average	5	5	5	5	5	0	0	0	0	1	0
